# Supplementary material for: Copper deposited diatom-biosilica with enhanced photothermal and photodynamic performance for infected wound therapy
Source: Royal Society of Chemistry journal article supplement (doi:10.1039/d1nj05283g), 2021-12-16
Supplement: d1nj05283g1.pdf [file d1nj05283g1.pdf]

# Supporting Information

## **Copper Deposited Diatom-biosilica with Enhanced Photothermal and Photodynamic Performance for Infected Wound Therapy**

Xin Cong<sup>a,1</sup>, Yuzhi Mu<sup>a,1</sup>, Di Qin<sup>a</sup>, Xiaojie Sun<sup>a</sup>, Chang Su<sup>a</sup>, Tongtong Chen<sup>a</sup>, Xiaoye Wang<sup>a</sup>, Xiguang Chen<sup>a,b</sup>, and Chao Feng<sup>a,\*</sup>

<sup>a</sup>College of Marine Life Science, Ocean University of China, 5# Yushan Road, Qingdao 266003, Shandong Province, China. E-mail: fengchao@ouc.edu.cn

<sup>b</sup>Qingdao national laboratory for marine science and technology, 1# Wenhai Road, Qingdao 266000, Shandong Province, China

<sup>1</sup>Co-first author: Xin Cong and Yuzhi Mu contributed equally to this work

Calculation of the photothermal conversion efficiency.

the photothermal conversion efficiency ( $\eta$ ) can be calculated as following equation

(1).<sup>[1]</sup>

$$\eta = \frac{hA(\Delta T_{max, min} - \Delta T_{max, H_2O})}{I(1 - 10^{-A\lambda})} \quad (1)$$

The lumped quantity  $hA$  was determined by equation (2).

$$\tau = \frac{cm}{hA} \quad (2)$$

where  $C$  and  $m$  were the heat capacity ( $4.2 \text{ J g}^{-1}$ ) of water and mass (2 g), respectively.

In order to get the  $hA$ ,  $\theta$  was introduced in, which was defined as the ratio of  $\Delta T$  to

$\Delta T_{max}$  (3).

$$\theta = \frac{\Delta T}{\Delta T_{Max}} \quad (3)$$

Where  $\tau$  can be calculated by linear relationship of time versus  $-\ln(\theta)$ :

$$t = k \times (-\ln(\theta)) + b$$

where  $t$  was the irradiation time,  $k$  and  $b$  were constants.  $\tau$  was equal to  $k$  in the formula.

Thus, the photothermal conversion efficiency ( $\eta$ ) of DBs and Cu-DBs could be calculated.

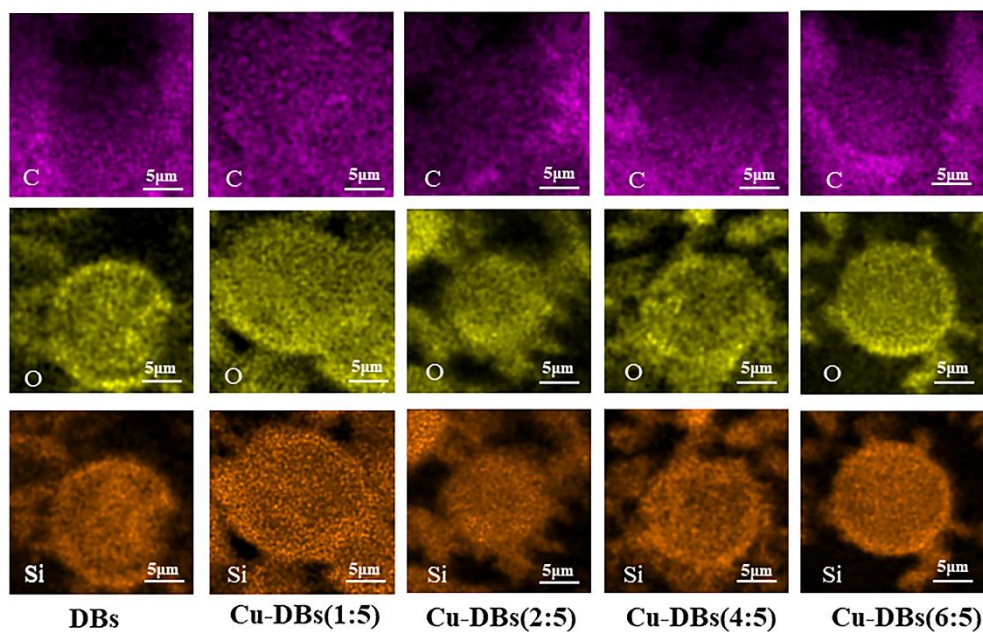

**Figure S1.** Elemental mapping images of DBs, Cu-DBs (1:5), Cu-DBs (2:5), Cu-DBs (4:5) and Cu-DBs (6:5).

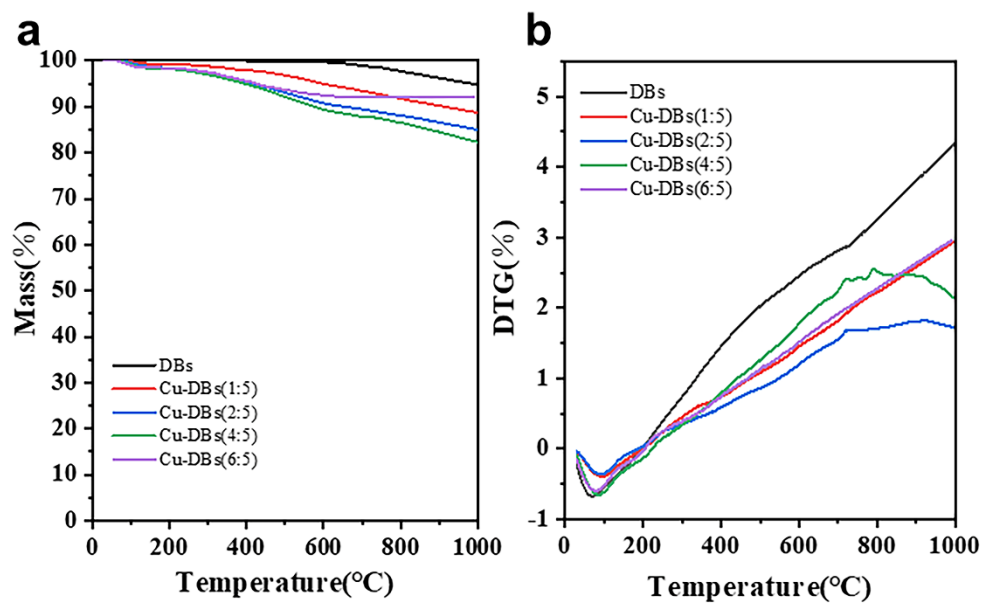

**Figure S2.** Thermogravimetric analysis of DBs and Cu-DBs: (a) Mass curve; (b) DTG curve.

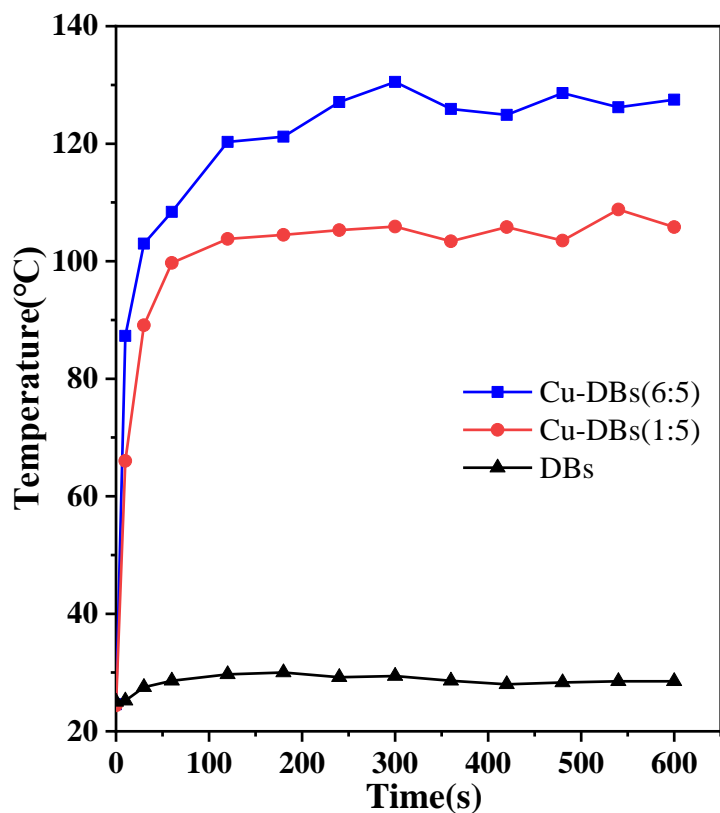

**Figure S3.** Photothermal curves of DBs, Cu-DBs (1:5) and Cu-DBs (6:5) powders ( $0.65 \text{ W cm}^{-2}$  for 10 min).

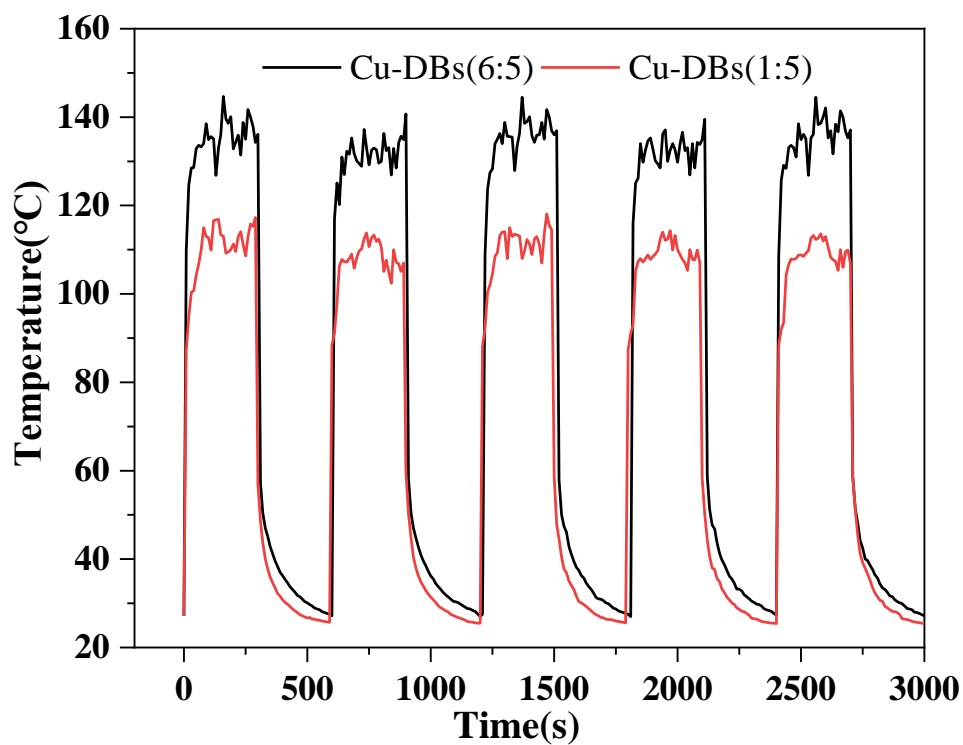

**Figure S4.** Photothermal stability tests of Cu-DBs (1:5) and Cu-DBs (6:5) with 10 min laser irradiation ( $0.65 \text{ W cm}^{-2}$ ) in five repeated times.

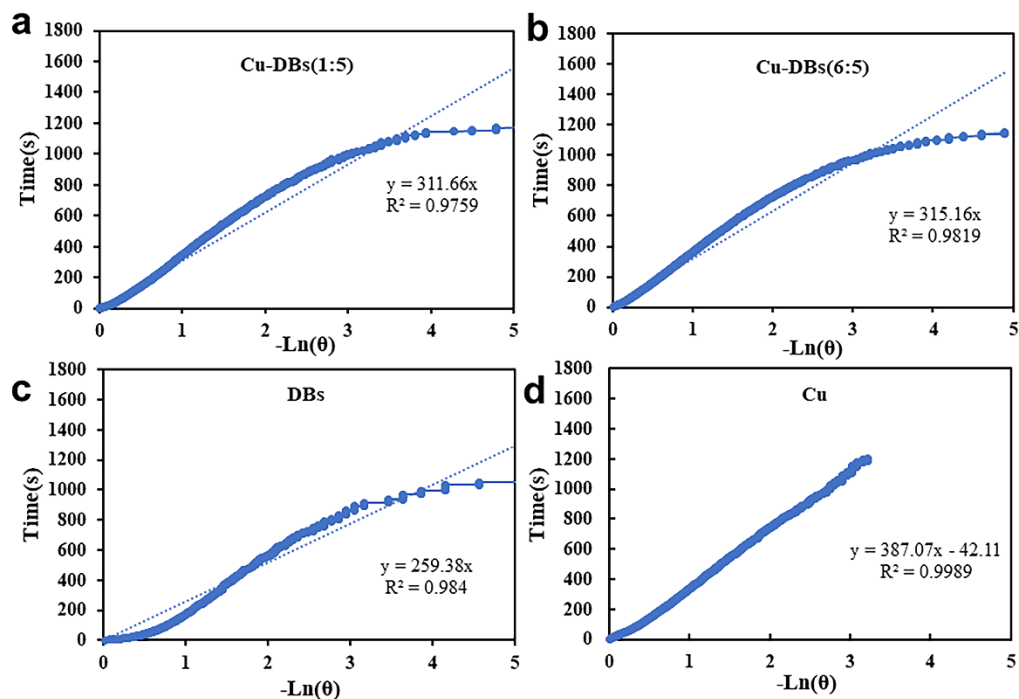

**Figure S5.** The linear relationship between time and minus  $\ln(\theta)$ . By using the linear time data of the cooling time of the panel, the heat transfer time constants of the Cu-DBs (1:5) system, the Cu-DBs (6:5) system, the DBs system and the Cu nanoparticles system under the condition of  $2\text{W cm}^{-2}$  were  $\tau_{s1} = 311.66\text{ s}$ ,  $\tau_{s2} = 315.16\text{ s}$ ,  $\tau_{s3} = 259.38\text{ s}$  and  $\tau_{s4} = 387.07\text{ s}$ , respectively.

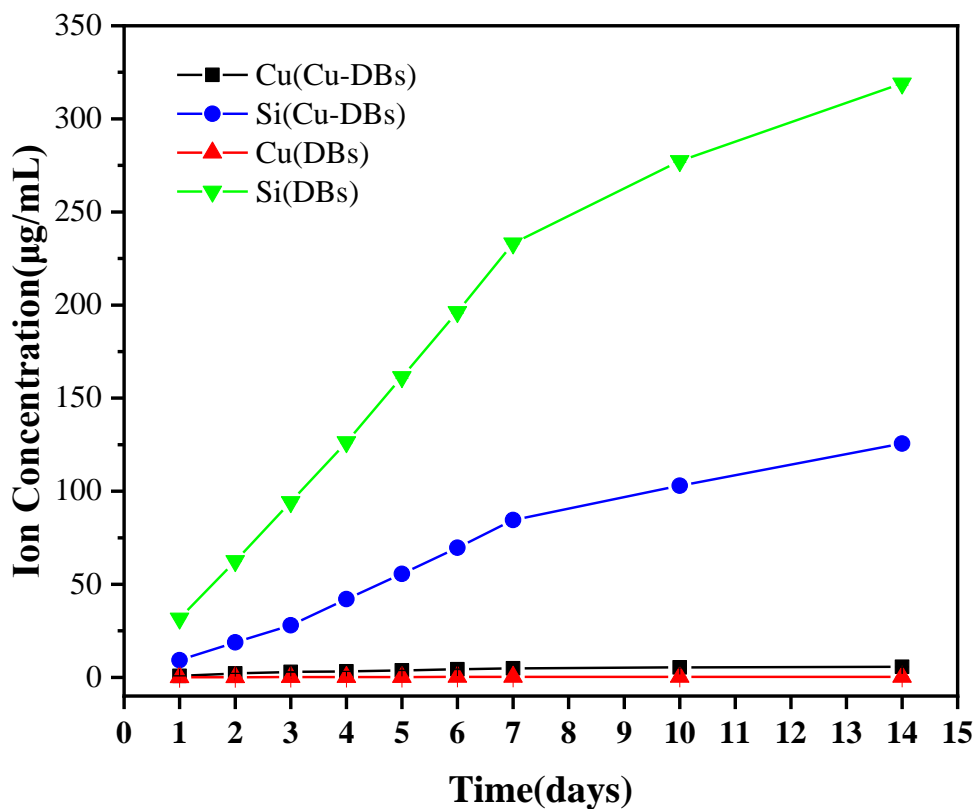

**Figure S6.** Si and Cu ions concentrations released from DBs and Cu-DBs (6:5) after immersion in PBS (PH=7.4) at 37 °C for 14 days. ( $n = 3$ ).

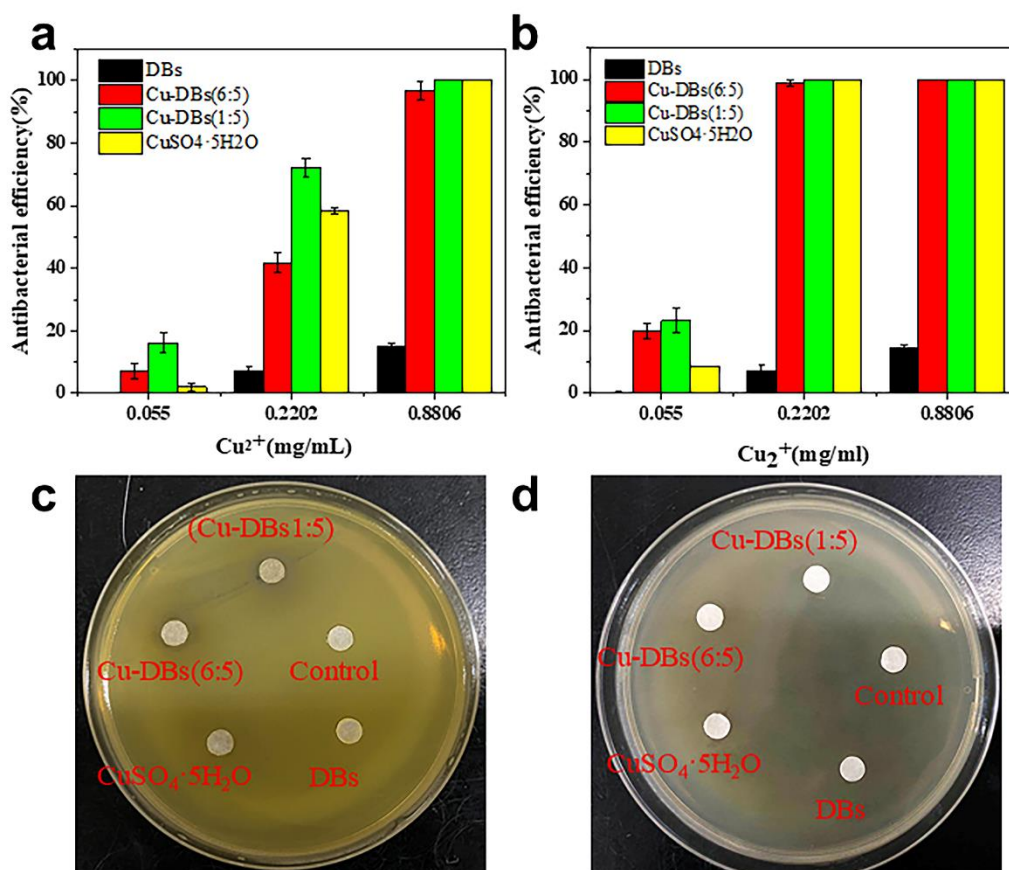

**Figure S7.** Statistical results of DBs, Cu-DBs and  $\text{CuSO}_4 \cdot 5\text{H}_2\text{O}$  antibacterial activities against (a) *S. aureus* and (b) *E. coli* at the same concentration of Cu ions (mean  $\pm$  SD, \* $p < 0.05$ , \*\* $p < 0.01$ , \*\*\* $p < 0.001$ ,  $n=3$ ); Inhibition rings of different bacteria in DBs, Cu-DBs and  $\text{CuSO}_4 \cdot 5\text{H}_2\text{O}$ : (c) *S. aureus* and (d) *E. coli*.

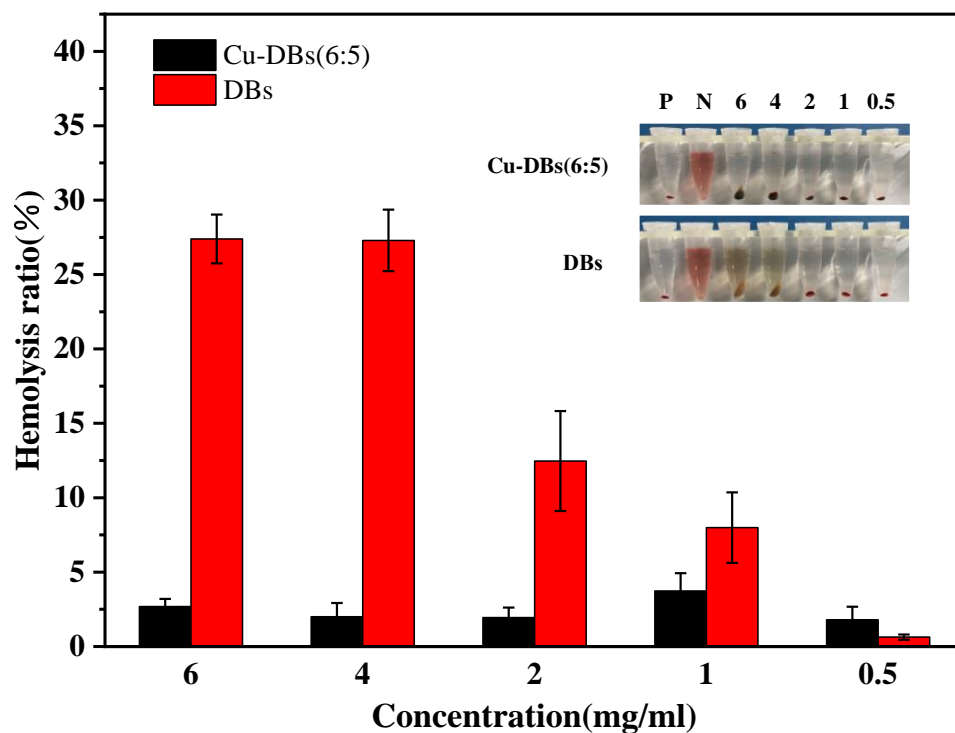

**Figure S8.** Hemolysis rate and photographs of DBs and Cu-DBs (6:5) at different concentrations. Data represents the mean  $\pm$  SD ( $n=5$ ).

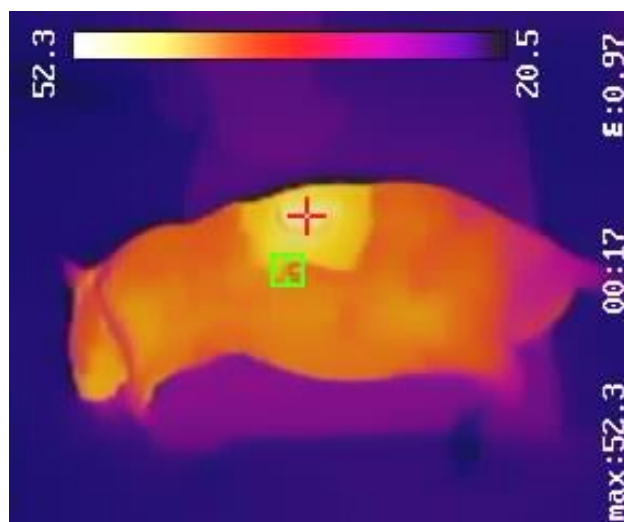

**Figure S9.** Photothermal images of rat treated with Cu-DBs (6:5) after 5 min NIR irradiation (808 nm, 2 W cm<sup>-2</sup>).

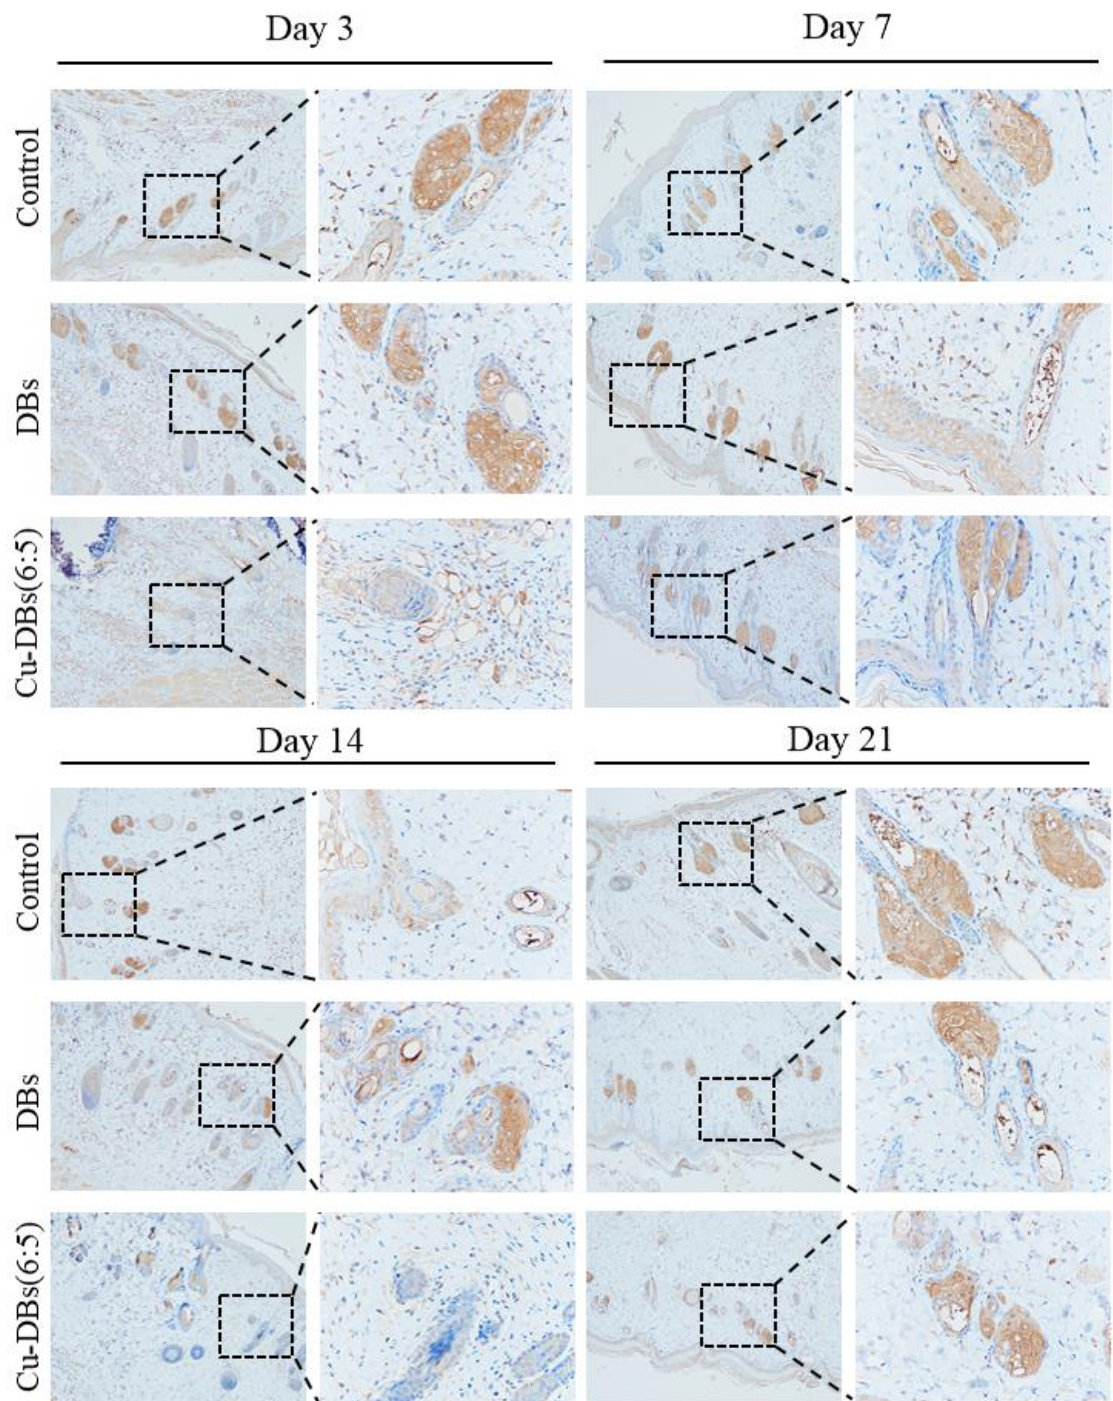

**Figure S10.** Immunofluorescence staining of TNF- $\alpha$  at 3, 7, 14 and 21 days.



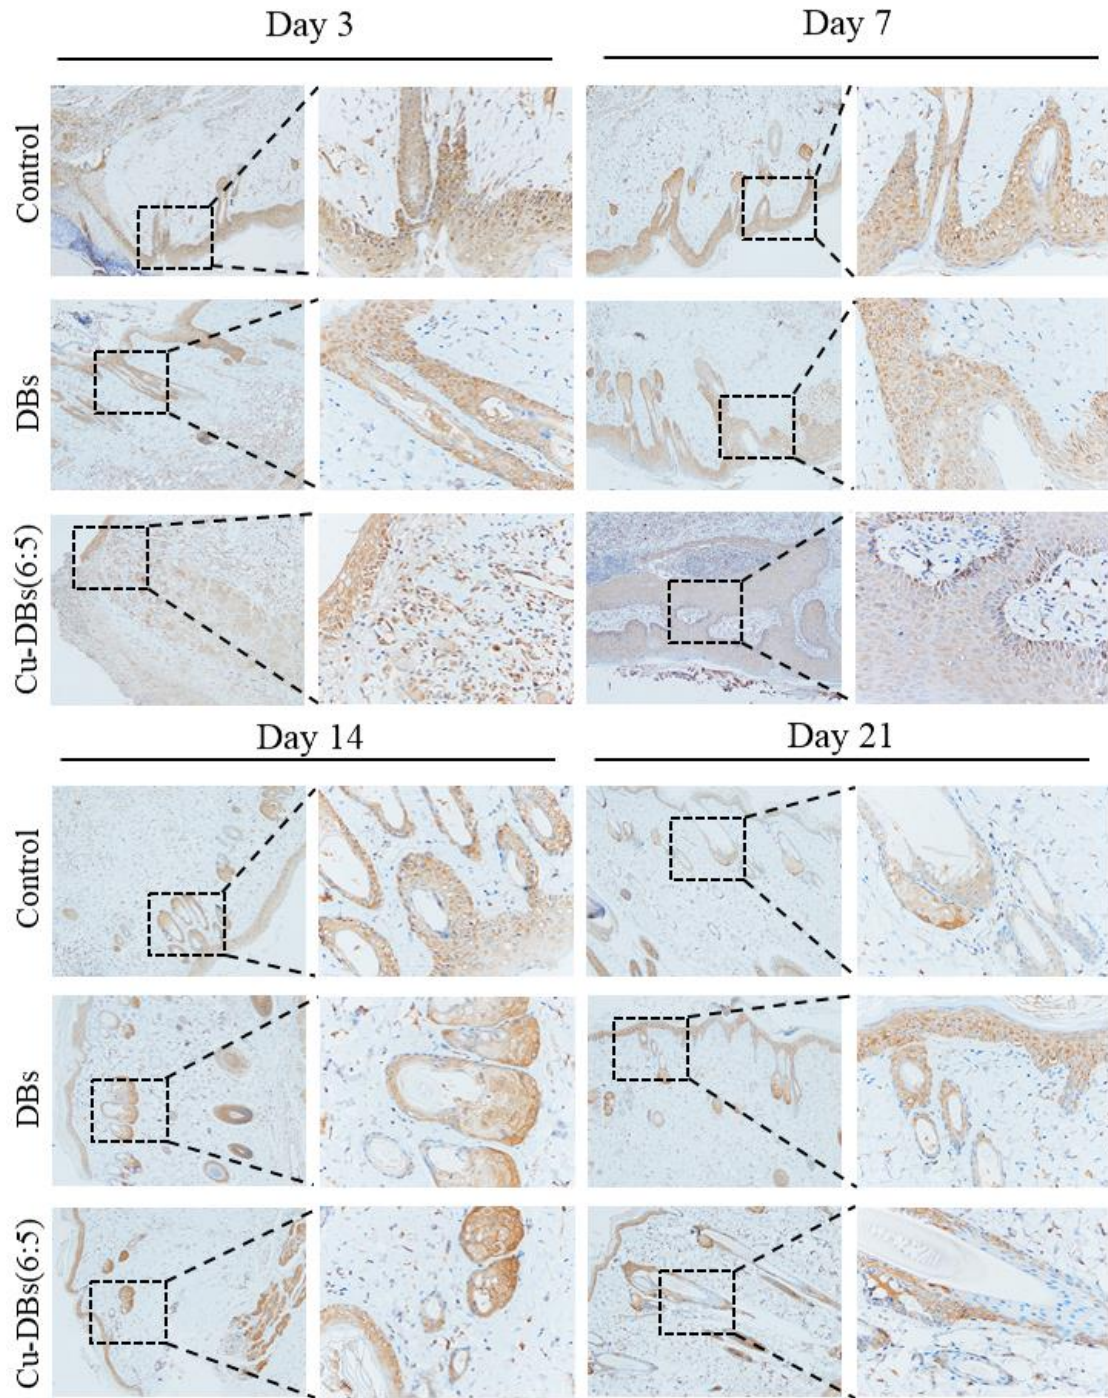

**Figure S11.** Immunofluorescence staining of IL-4 at 3, 7, 14 and 21 days.

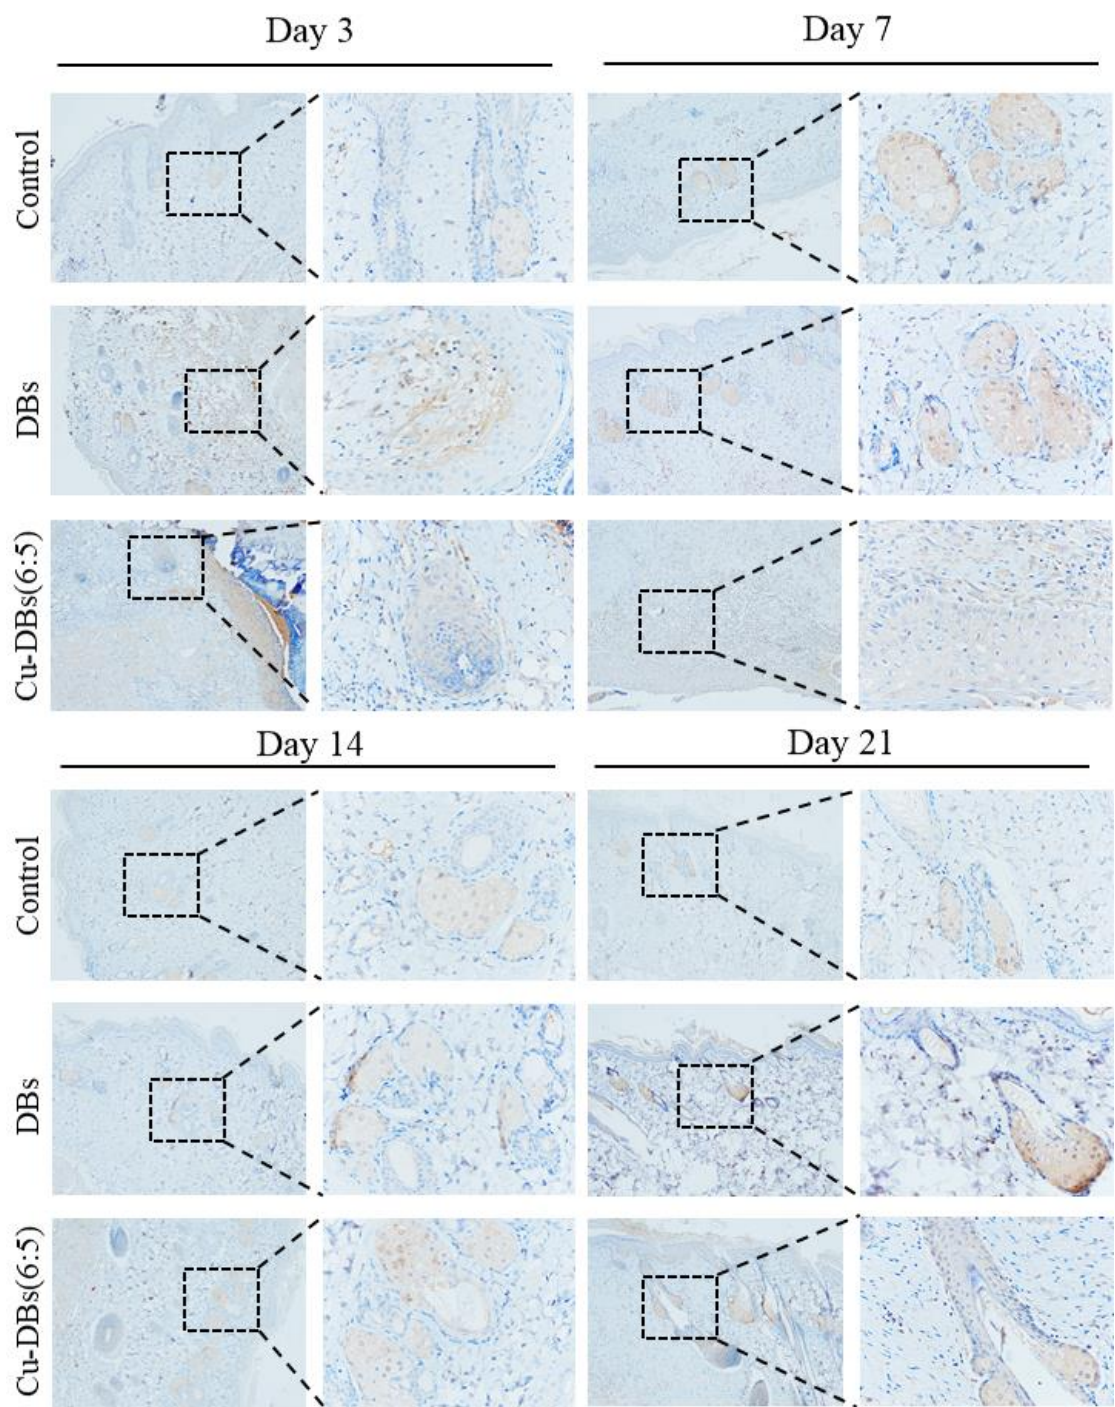

**Figure S12.** Immunofluorescence staining of IL-10 at 3, 7, 14 and 21 days.

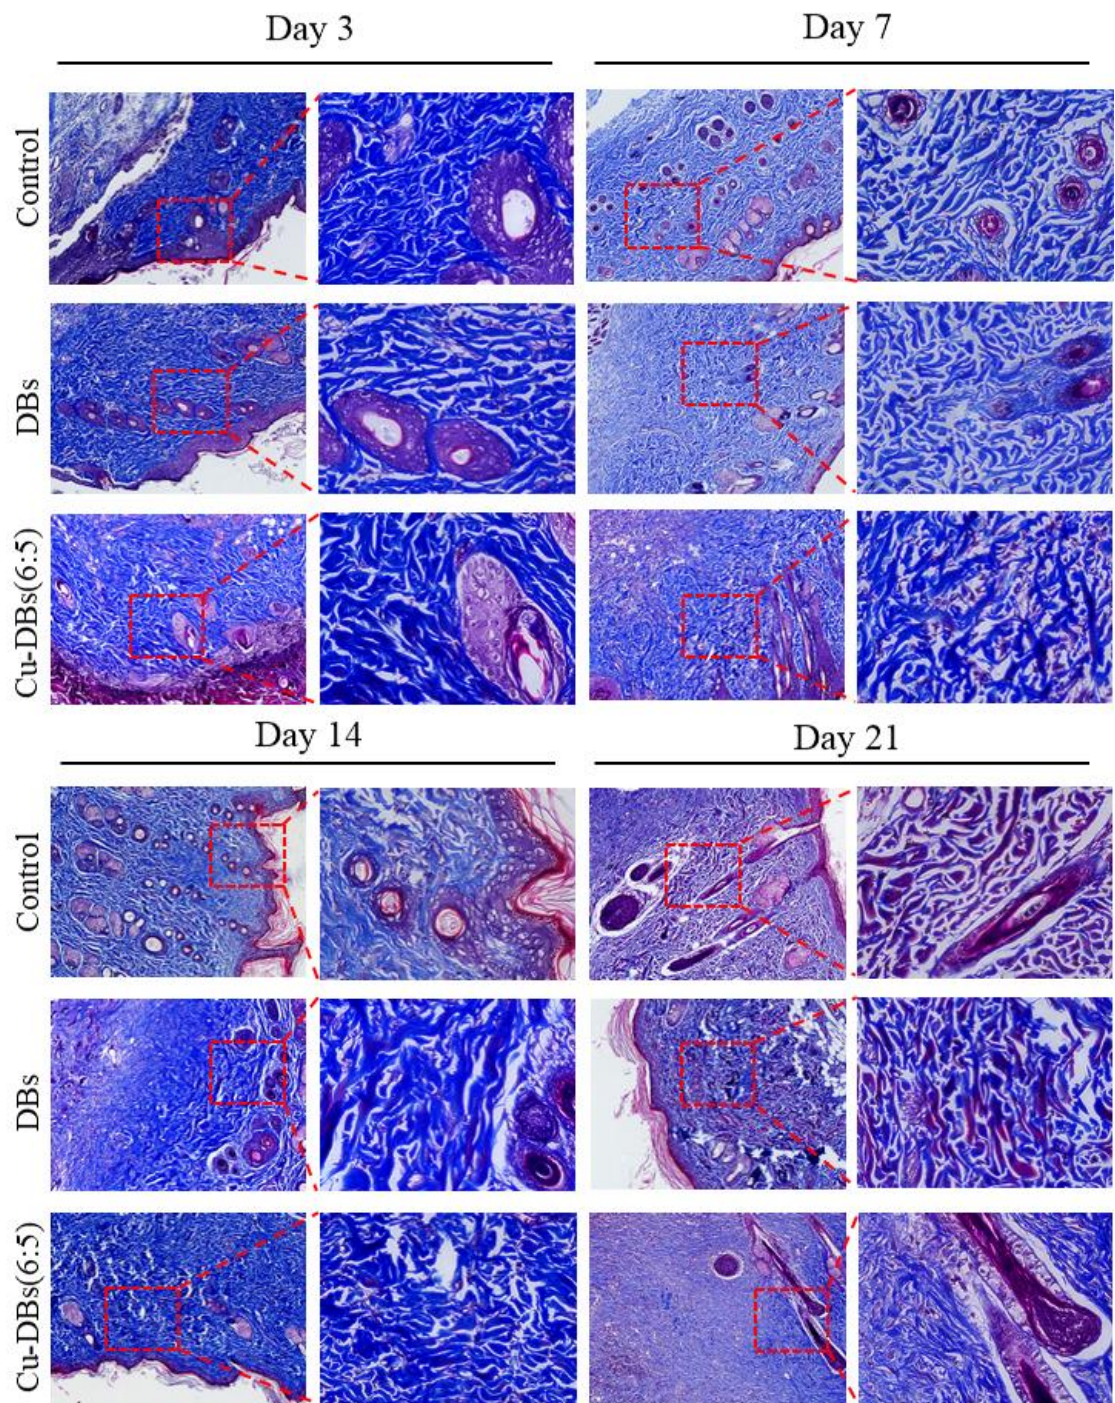

**Figure S13.** Masson staining of wound tissues treated with DBs and Cu-DBs (6:5) at 3, 7, 14 and 21 days.

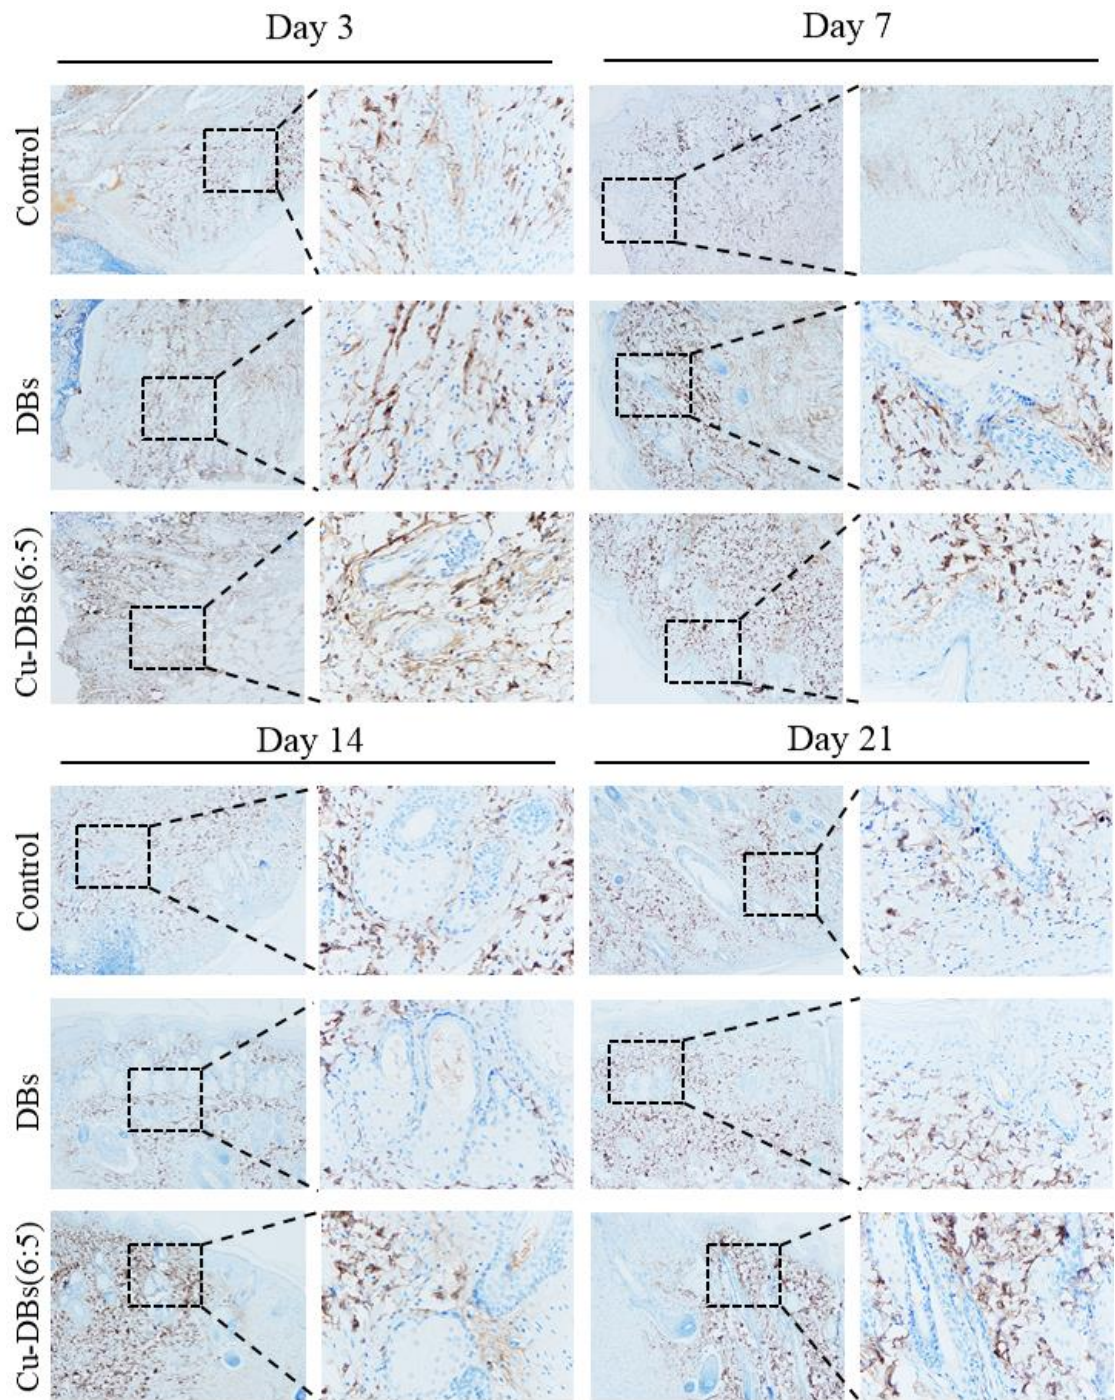

**Figure S14.** Immunofluorescence staining of type-III collagen at 3, 7, 14 and 21 days.

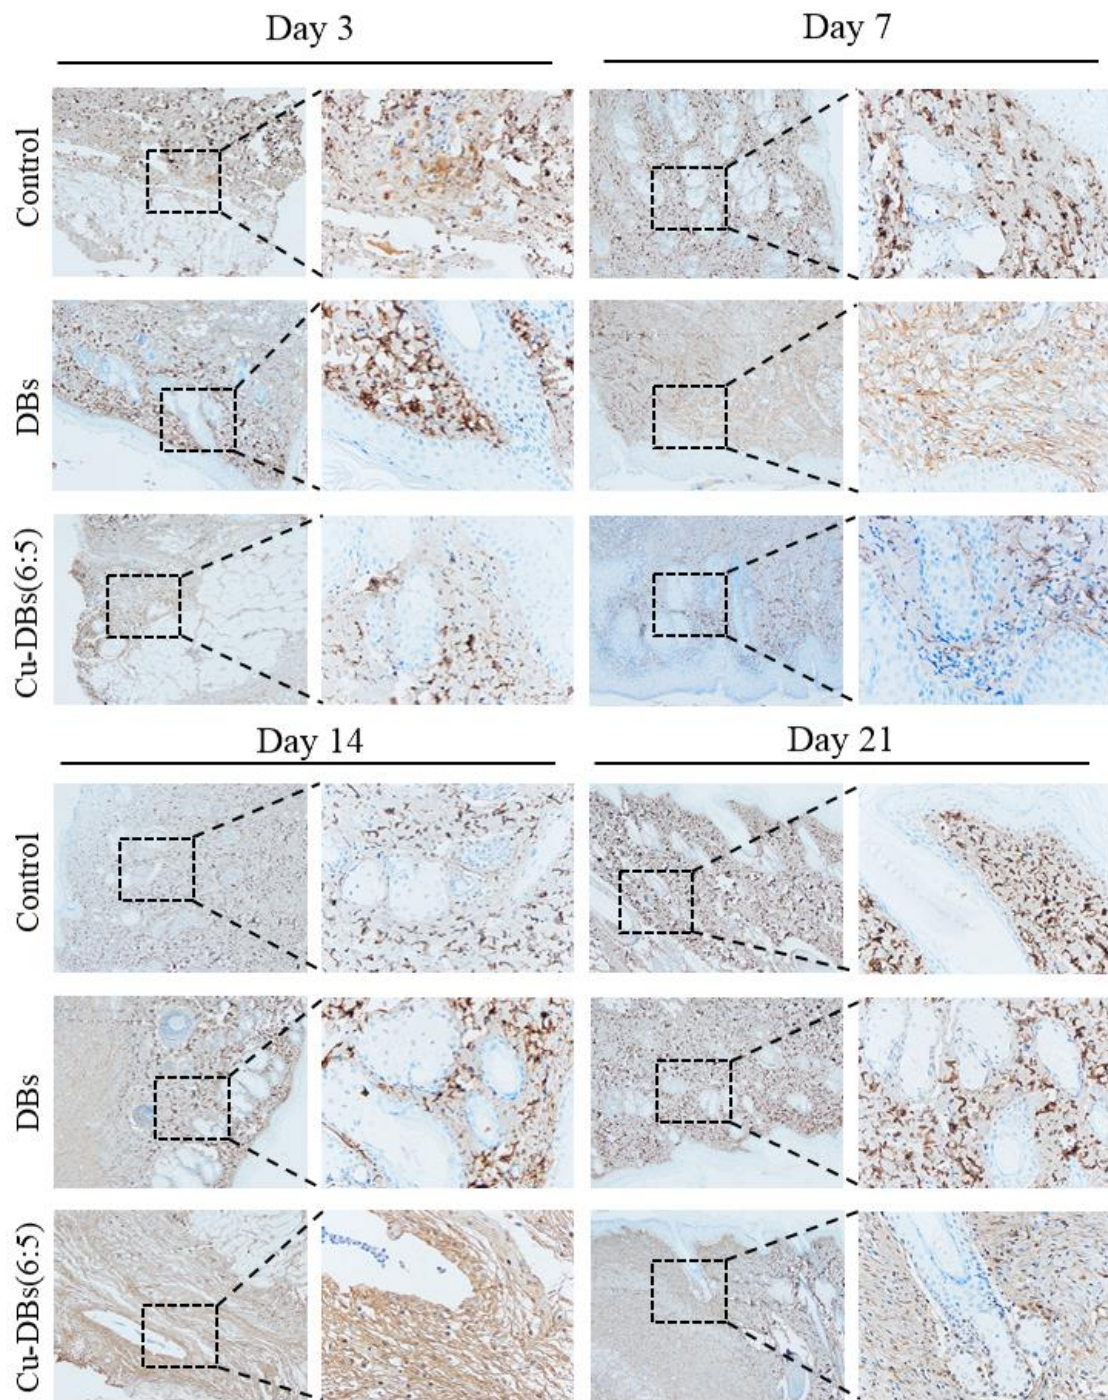

**Figure S15.** Immunofluorescence staining of type-I collagen at 3, 7, 14 and 21 days.

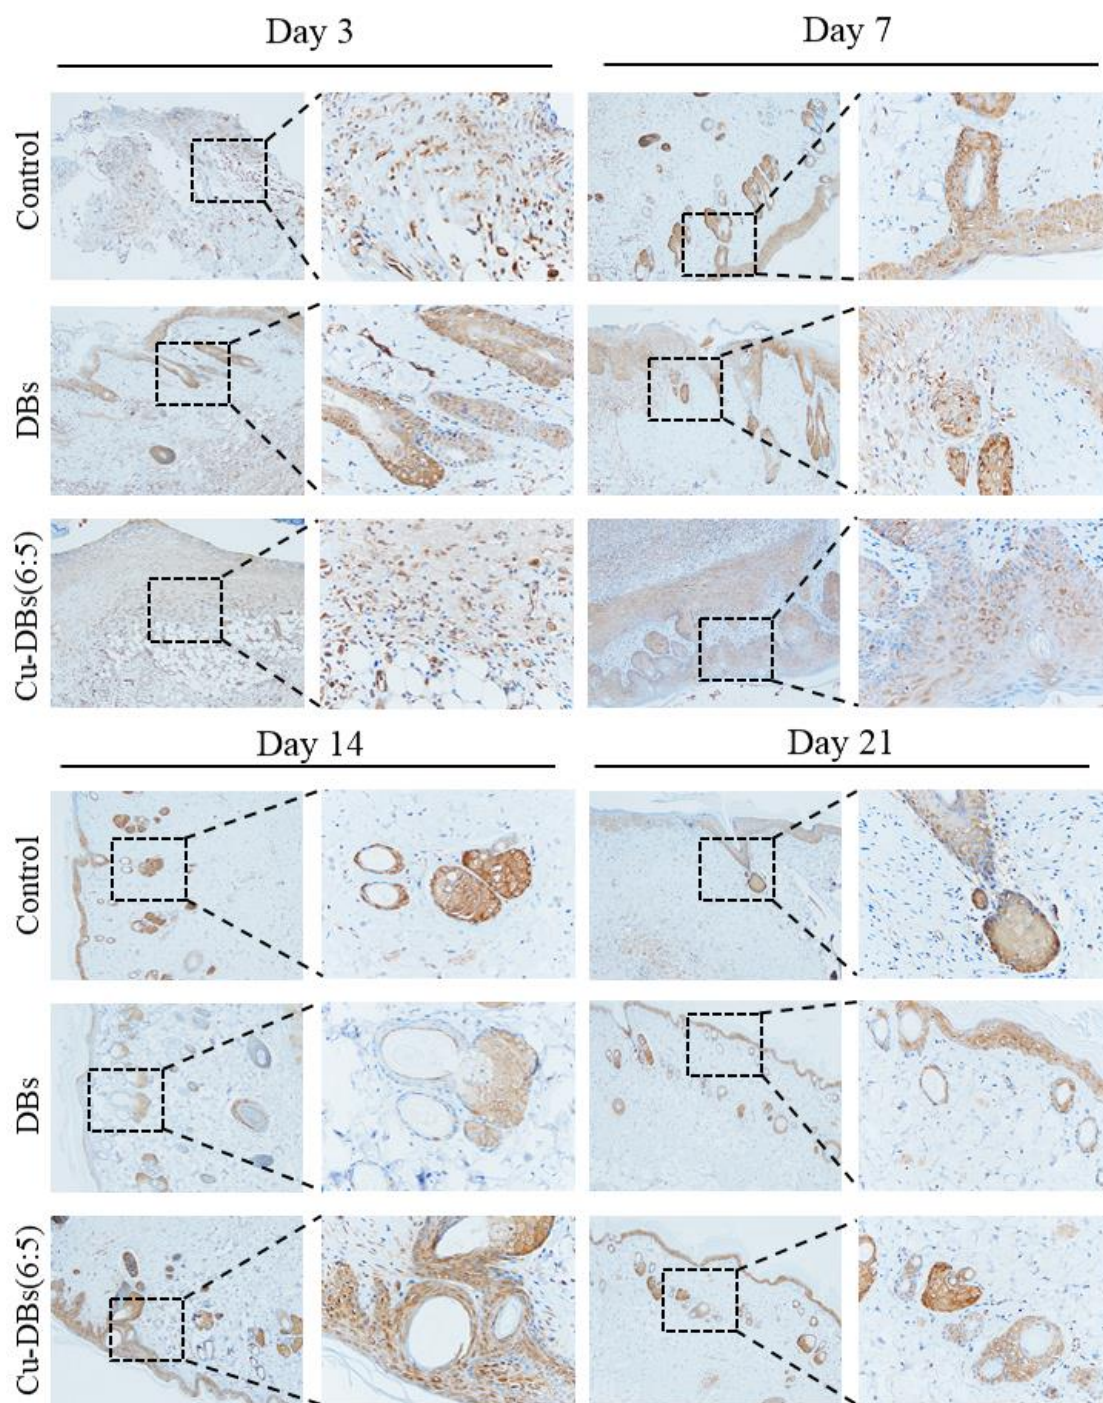

**Figure S16.** Immunofluorescence staining of HSP90 at 3, 7, 14 and 21 days.

## References

- [1] W. Ren, Y. Yan, L. Zeng, Z. Shi, A. Gong, P. Schaaf, D. Wang, J. Zhao, B. Zou, H. Yu, G. Chen, E. M. Brown, A. Wu, *Adv Healthc Mater* 2015, 4, 1526.
